# Supplementary material for: High-throughput tracking enables systematic phenotyping and drug repurposing in C. elegans disease models
Source: eLife. 2025 Jan 8;12:RP92491. doi: 10.7554/eLife.92491 (PMC11709427; doi:10.7554/eLife.92491)
Supplement: Supplementary file 1. — Alongside denoting which (and how many) gene orthology programs predict that the worm gene is an orthologous to a human gene, and the genetic similarity and Blast-E score for each C. elegans gene. [file elife-92491-supp1.xlsx]

## Sheet: Sheet1
Worm Gene	Databases Predicting Gene is a Human Ortholog	Ensembl ID	WormBase ID	No. Programs Predicting Orthology	Genetic similarity (%)	Blast E- value
bbs-1	Ensembl Compara 87-89|Homologene|InParanoid|OrthoInspector	ENSG00000174483	WBGene00000241	4	98.6	2e-77
snf-11	Ensembl Compara 87- 89|Homologene|InParanoid|OrthoInspector|OrthoMCL	ENSG00000157103	WBGene00004910	5	98.2	0
unc-25	Ensembl Compara 87- 89|Homologene|InParanoid|OMA|OrthoInspector|OrthoMCL	ENSG00000128683	WBGene00006762	6	96.9	0
tmem-231	Ensembl Compara 87-89|InParanoid|OMA|OrthoInspector|OrthoMCL	ENSG00000205084	WBGene00020825	5	95.7	3e-12
unc-49	OrthoInspector	ENSG00000101958	WBGene00006784	1	94.1	1e-98
nca-2	Ensembl Compara 87- 89|Homologene|InParanoid|OMA|OrthoInspector|OrthoMCL	ENSG00000102452	WBGene00003558	6	93.9	0
gpb-2	Ensembl Compara 87- 89|Homologene|InParanoid|OMA|OrthoInspector|OrthoMCL	ENSG00000069966	WBGene00001680	6	93	5e-172
unc-77	Ensembl Compara 87- 89|Homologene|InParanoid|OrthoInspector|OrthoMCL	ENSG00000102452	WBGene00006809	5	91.9	0
kcc-2	Ensembl Compara 87-89|InParanoid|OrthoInspector|OrthoMCL	ENSG00000124140, ENSG00000140199	WBGene00019205	4	90.5	0
glc-2	Ensembl Compara 87-89|OrthoInspector|OrthoMCL	ENSG00000145888, ENSG00000109738	WBGene00001592	3	90.1	2e-91
avr-14	Ensembl Compara 87-89|Homologene|OMA|OrthoInspector|OrthoMCL	ENSG00000145888, ENSG00000109738	WBGene00000232	5	90	9e-103
bbs-2	Ensembl Compara 87- 89|Homologene|InParanoid|OMA|OrthoInspector|OrthoMCL	ENSG00000125124	WBGene00000242	6	89.4	4e-119
unc-43	Ensembl Compara 87-89|InParanoid|OrthoInspector	ENSG00000070808, ENSG00000058404	WBGene00006779	3	83	0
cat-4	Ensembl Compara 87- 89|Homologene|InParanoid|OMA|OrthoInspector|OrthoMCL	ENSG00000131979	WBGene00000298	6	82.5	2e-98
add-1	Ensembl Compara 87-89|InParanoid|OrthoInspector|OrthoMCL	ENSG00000148700, ENSG00000087274	WBGene00000072	4	79.9	2e-119
glr-4	Ensembl Compara 87-89|Homologene|OrthoInspector|OrthoMCL	ENSG00000164418	WBGene00001615	4	79.1	6e-151
glr-1	Ensembl Compara 87- 89|Homologene|InParanoid|OrthoInspector|OrthoMCL	ENSG00000125675, ENSG00000164418	WBGene00001612	5	78	4e-180
figo-1	Ensembl Compara 87-89|InParanoid|OMA|OrthoInspector|OrthoMCL	ENSG00000112367	WBGene00007912	5	74.4	8e-160
pink-1	Ensembl Compara 87- 89|Homologene|InParanoid|OrthoInspector|OrthoMCL	ENSG00000158828	WBGene00017137	5	72.1	9e-57
snn-1	Ensembl Compara 87-89|InParanoid|OrthoInspector|OrthoMCL	ENSG00000008056, ENSG00000157152	WBGene00004913	4	66.2	1e-43
cat-2	Ensembl Compara 87-89|Homologene|OMA|OrthoMCL	ENSG00000180176	WBGene00000296	4	62.6	8e-126
tub-1	Ensembl Compara 87- 89|Homologene|InParanoid|OrthoInspector|OrthoMCL	ENSG00000166402, ENSG00000112041	WBGene00006655	5	61.3	3e-105
unc-80	Ensembl Compara 87-89|InParanoid|OMA|OrthoInspector|OrthoMCL	ENSG00000144406	WBGene00006812	5	42.8	0
dys-1	InParanoid|OrthoInspector|OrthoMCL	ENSG00000198947	WBGene00001131	3	30.9	4e-169
mpz-1	Ensembl Compara 87-89|InParanoid|OMA|OrthoInspector|OrthoMCL	ENSG00000107186	WBGene00003404	5	16.1	3e-72
