# Supplementary material for: High-throughput tracking enables systematic phenotyping and drug repurposing in C. elegans disease models
Source: eLife. 2025 Jan 8;12:RP92491. doi: 10.7554/eLife.92491 (PMC11709427; doi:10.7554/eLife.92491)
Supplement: Supplementary file 3. [file elife-92491-supp3.xlsx]

## Sheet: Sheet1
Worm Gene	Human Ortholog(s)	Functional Class	ADHD	Agenesis of the corpus callosum	Aggressive behaviour	Amyotrophic lateral sclerosis	Anxiety	Artery disease	Astigmatism	Ataxia	Autism	Bardet-Biedl syndrome	Becker muscular dystrophy	Bipolar disorder	Brachycephaly	Bradykinesia	Cardiomyopathy	Cerebral palsy	Charcot-Marie-Tooth disease	Contractures	Decreased nerve conduction velocity	Depression	Developmental delay	Diabetes	Duchenne muscular dystrophy	Dystonia	Encephalopathy	Epilepsy	Esotropia	Exotropia	Feeding difficulties	Fatigue	Fibrosis	Glaucoma	Hearing impairment	Hernia	Heterotopia	Huntington's Disease	Hydrocephalus	Hyperekplexia	Hyperphenylalaninemia	Hyperreflexia	Hypertension	Hypertonia	Hypokinesia	Hypotonia	Intellectual disability	Joubert syndrome	Leber congenital amaurosis

add-1	ADD1;ADD2; ADD3	Adductin (actin filament binding)						1										1					1							1	1						1					1	1				1
avr-14	GLRA1;GLRA3; GLRA4;GLRB	Glycine receptor							1	1																			1		1					1				1		1		1	1		1
bbs-1	BBS1	Ciliary protein						1	1	1		1											1	1									1	1	1							1	1			1	1
bbs-2	BBS2	Ciliary protein						1				1					1						1	1									1	1	1							1	1				1
cat-2	TH	Monoamine biosynthesis						1		1						1										1	1				1											1			1	1	1
cat-4	GHC1	Monoamine biosynthesis					1			1				1		1				1		1				1						1			1						1	1	1	1		1	1
dys-1	DMD	Dystrophin biosynthesis											1				1			1					1							1			1											1	1
figo-1	FIG4	Polyphosphoinositide phosphatase		1	1	1	1										1		1	1	1	1	1					1			1	1											1			1	1
glc-2	GLRA1;GLRB	Glycine receptor							1	1																			1		1					1				1		1		1	1		1
glr-1	GRIA3;GRIK2	Ionotropic glutamate receptor	1	1			1			1	1				1								1				1	1							1			1				1		1		1	1
glr-4	GRIK2	Ionotropic glutamate receptor	1	1			1			1	1												1				1	1							1									1		1	1
gpb-2	GNB5	G protein coupled receptor	1																				1					1			1															1	1
kcc-2	SLC12A5; SLC12A6	Solute carrier protein/Synaptic function		1											1				1	1	1		1				1	1			1															1	1
mpz-1	MPDZ	PDZ scaffold domain assembly; monoamine biosynthesis		1																															1				1							1	1
nca-2	NALCN	Sodium cation leak channel													1					1	1		1								1				1	1						1				1	1
pink-1	PINK1	Protein kinase					1			1						1						1				1																1					1
snf-11	SLC6A1	Solute carrier protein	1							1	1												1					1																		1	1
snn-1	SYN1;SYN2	Synaptic function			1						1																	1																			1
tmem-231	TMEM231	Ciliary protein		1	1					1	1												1				1						1						1							1	1	1
tub-1	TUB;TUB3; TULP1	Ciliary protein/GPCR																					1	1										1	1							1				1	1		1
unc-25	GAD1; GAD2	GABA biosynthesis								1				1				1		1			1	1		1	1	1														1			1	1	1
unc-43	CAMK2A;CAMK2B; CAMK2D	Protein kinase			1					1	1				1			1					1								1															1	1
unc-49	GABRB1;GABRB2; GABRB3	GABA receptor	1		1		1			1	1											1	1			1	1	1			1									1				1		1	1
unc-77	NALCN	Sodium cation leak channel													1					1	1		1								1				1	1						1				1	1
unc-80	UNC80	Sodium cation leak channel/GPCR													1					1			1				1				1											1				1	1
[truncated: 12 more columns]
